# Supplementary material
Source: publisher figshare collection journal article supplement (https://tandf.figshare.com/articles/dataset/_/21829470)
Supplement: Supplementary file 1 [file 1]

## **Die Faktorenstruktur von PTBS und der Einfluss des Geschlechts am Beispiel von Traumaüberlebenden in Indien**

Ruby Charak, Cherie Armour, Ask Elklit, Disket Angmo, Jon D Elhai, Hans M Koot

Hintergrund: Die Faktorenstruktur von PTBS wurde in westlichen Ländern schon sehr intensiv untersucht. Es wurden auch einige Studien zur Faktorstruktur in Asien durchgeführt (China, Sri Lanka und Malaysia) aber sehr wenige untersuchten die Faktorenstruktur von PTBS anhand einer Stichprobe von indischen Erwachsenen. Darüber hinaus ist es in einer weitestgehend patriarchalen Gesellschaft mit sehr starken Genderrollen, wie in Indien, interessant, auch den Zusammenhang zwischen den Faktoren von PTBS und Geschlecht zu untersuchen.

Ziel: Das Ziel dieser Studie war, die Faktorenstruktur der PTBS an einer Stichprobe indischer Traumaüberlebender zu untersuchen. Basierend auf aktuellen PTBS Modellen, wie es im DSM-IV-TR (APA, 2000) definiert wird.

Methode: Drei existierende PTBS Modelle- zwei Vier-Faktoren-Modelle (emotionale Betäubung und Dysphorie) und ein Fünf-Faktoren-Modell (Dysphorisches Arousal)- wurden unter Anwendung der konfirmatorischen Faktorenanalyse mit Geschlecht als Kovariate berechnet. Die drei konkurrierenden Modelle zeigten ähnliche Passung, wobei das Modell des dysphorischen Arousal signifikant besser passte als die beiden anderen Modelle. Geschlechtsunterschiede zeigten sich faktorenübergreifend bei Wiedererleben und nervöser Erregbarkeit (Arousal).

Schlussfolgerungen: Die Ergebnisse weisen darauf hin, dass das Modell des dysphorischen Arousal der PTBS jenes ist, welches die Daten am besten erklärt; obwohl die Passung aller drei Modelle sehr ähnlich ist. Frauen zeigten im Vergleich zu Männern höhere Werte in den Faktoren Wiedererleben und Nervöses Arousal. Die gefundenen Geschlechtsunterschiede werden im Lichte des sozialen Milieus in Indien diskutiert.

Keywords: PTBS, Faktorenstruktur, Gender, Dysphorisches Arousal Model, MIMIC, Naturkatastrophen, Kriegsbedingte Dislokation

Name of translator: Sarah Hübl, Brigitte Lueger-Schuster

Citation: European Journal of Psychotraumatology 2014, 5: 25547 - <http://dx.doi.org/10.3402/ejpt.v5.25547>
